# Supplementary material for: Nutritional control regulates symbiont proliferation and life history in coral-dinoflagellate symbiosis
Source: PubMed Central journal article supplement (PMC9102920; doi:10.1186/s12915-022-01306-2), 2022-05-13
Supplement: 12915_2022_1306_MOESM2_ESM.pdf [file 12915_2022_1306_MOESM2_ESM.pdf]

**Table S1 Symbiotic cnidarian species searched for SLL-2 homologs**

|                             | <b>Species</b>                   | <b>References</b>            |
|-----------------------------|----------------------------------|------------------------------|
| <b>Reef-building corals</b> | <i>Acropora digitifera</i>       | Shinzato et al. (2011)       |
|                             | <i>Acropora tenuis</i>           | Voolstra et al. (2015)       |
|                             | <i>Fungia spp.</i>               | Voolstra et al. (2015)       |
|                             | <i>Galaxea fasciularis</i>       | Voolstra et al. (2015)       |
|                             | <i>Goniastrea aspera</i>         | Voolstra et al. (2015)       |
|                             | <i>Pocillopora damicornis</i>    | Cunning et al. (2018)        |
|                             | <i>Pocillopora verrucosa</i>     | Buitrago-Lopez et al. (2020) |
|                             | <i>Porites lutea</i>             | Voolstra et al. (2015)       |
|                             | <i>Stylophora pistillata</i>     | Voolstra et al. (2017)       |
|                             | <i>Pachyseris speciosa</i>       | Voolstra et al. (2015)       |
| <b>Corallimorpharia</b>     | <i>Amplexidiscus fenestrafer</i> | Wang et al. (2017)           |
|                             | <i>Discosoma sp.</i>             | Wang et al. (2017)           |
| <b>Sea anemones</b>         | <i>Actinia equina</i>            | Wilding et al. (2020)        |
|                             | <i>Actinia tenebrosa</i>         | van der Burg et al. (2016)   |
|                             | <i>Aiptasia pallida</i>          | Baumgarten et al. (2015)     |
|                             | <i>Anthopleura buddemeieri</i>   | van der Burg et al. (2016)   |
|                             | <i>Aulactinia veratra</i>        | van der Burg et al. (2016)   |
|                             | <i>Calliactis polypus</i>        | van der Burg et al. (2016)   |
|                             | <i>Nemanthus annamensis</i>      | van der Burg et al. (2016)   |
|                             | <i>Telmatactis sp.C</i>          | van der Burg et al. (2016)   |

Baumgarten, S., Simakov, O., Esherick, L.Y., Liew, Y.J., Lehnert, E.M., Michell, C.T., Li, Y., Hambleton, E.A., Guse, A., Oates, M.E., *et al.* (2015). The genome of *Aiptasia*, a sea anemone model for coral symbiosis. *Proc Natl Acad Sci U S A* *112*, 11893-11898.

Buitrago-Lopez, C., Mariappan, K.G., Cardenas, A., Gegner, H.M., and Voolstra, C.R. (2020). The Genome of the Cauliflower Coral *Pocillopora verrucosa*. *Genome Biol Evol* *12*, 1911-1917.

Cunning, R., Bay, R.A., Gillette, P., Baker, A.C., and Traylor-Knowles, N. (2018). Comparative analysis of the *Pocillopora damicornis* genome highlights role of immune system in coral evolution. *Sci Rep* *8*, 16134.

Shinzato, C., Shoguchi, E., Kawashima, T., Hamada, M., Hisata, K., Tanaka, M., Fujie, M., Fujiwara, M., Koyanagi, R., Ikuta, T., *et al.* (2011). Using the *Acropora digitifera* genome to understand coral responses to environmental change. *Nature* *476*, 320-323.

van der Burg, C.A., Prentis, P.J., Surm, J.M., and Pavasovic, A. (2016). Insights into the innate immunome of actinarians using a comparative genomic approach. *Bmc Genomics* *17*.

Voolstra, C.R., Li, Y., Liew, Y.J., Baumgarten, S., Zoccola, D., Flot, J.F., Tambutte, S., Allemand, D., and Aranda, M. (2017). Comparative analysis of the genomes of *Stylophora pistillata* and *Acropora digitifera* provides evidence for extensive differences between species of corals. *Sci Rep* *7*, 17583.

Voolstra, C.R., Miller, D.J., Ragan, M.A., Hoffmann, A.A., Hoegh-Guldberg, O., Bourne, D.G., Ball, E.E., Ying, H., Foret, S., Takahashi, S., *et al.* (2015). The ReFuGe 2020 Consortium-using "omics" approaches to explore the adaptability and resilience of coral holobionts to environmental change. *Front Mar Sci* *2*.

Wang, X., Liew, Y.J., Li, Y., Zoccola, D., Tambutte, S., and Aranda, M. (2017). Draft genomes of the corallimorpharians *Amplexidiscus fenestrafer* and *Discosoma sp.* *Mol Ecol Resour* *17*, e187-e195.

Wilding, C.S., Fletcher, N., Smith, E.K., Prentis, P., Weedall, G.D., and Stewart, Z. (2020). The genome of the sea anemone *Actinia equina* (L.): Meiotic toolkit genes and the question of sexual reproduction. *Mar Genomics* *53*, 100753.

**Table S2 Chemical composition of stock solutions in f/2 medium**

| <b>Chemicals</b>                                    | <b>Concentrations</b> |
|-----------------------------------------------------|-----------------------|
| <b>1. Nitrate stock (1,000 x)</b>                   |                       |
| NaNO <sub>3</sub>                                   | 75 g/L                |
| <b>2. Na<sub>2</sub>EDTA stock (1,000 x)</b>        |                       |
| Na <sub>2</sub> EDTA·2H <sub>2</sub> O              | 4.36 g/L              |
| <b>3. Trace metals stock (10,000 x)</b>             |                       |
| CuSO <sub>4</sub> ·5H <sub>2</sub> O                | 100 mg/L              |
| ZnSO <sub>4</sub> ·7H <sub>2</sub> O                | 220 mg/L              |
| CoCl <sub>2</sub> ·6H <sub>2</sub> O                | 100 mg/L              |
| MnCl <sub>2</sub> ·4H <sub>2</sub> O                | 1.8 g/L               |
| Na <sub>2</sub> MoO <sub>4</sub> ·2H <sub>2</sub> O | 60 mg/L               |
| <b>4. Iron stock (1,000 x)</b>                      |                       |
| FeCl <sub>3</sub> ·6H <sub>2</sub> O                | 3.15 g/L              |
| <b>5. Phosphate stock (1,000 x)</b>                 |                       |
| NaH <sub>2</sub> PO <sub>4</sub>                    | 4.411 g/L             |
| <b>6. Vitamins stock (100,000 x)</b>                |                       |
| Biotin                                              | 500 mg/L              |
| Vitamin B12                                         | 500 mg/L              |
| Thiamine HCl                                        | 10 g/L                |
